# Supplementary material for: Phenolic Extraction of Moringa oleifera Leaves in DES: Characterization of the Extracts and Their Application in Methylcellulose Films for Food Packaging
Source: MDPI journal article supplement (doi:10.3390/foods11172641), 2022-08-31
Supplement: s1 [file s1]

# Phenolic extraction of *Moringa oleifera* leaves in DES: characterization of the extracts and their application in methylcellulose films for food packaging

Fazia Braham<sup>1,2</sup>, Luísa M.P.F. Amaral<sup>2,3</sup>, Krzysztof Biernacki<sup>2</sup>, Daniel O. Carvalho<sup>3</sup>, Luis F. Guido<sup>3</sup>, Júlia M.C.S., Magalhães<sup>2</sup>, F. Zaidi<sup>1</sup>, Hiléia K.S. Souza<sup>2,4\*</sup> and Maria P. Gonçalves<sup>2</sup>

<sup>1</sup>Département des Sciences Alimentaires, Faculté des Sciences de la Nature et de la Vie, Université de Bejaia, Route Targa Ouzemour, Bejaia 06000, Algeria

<sup>2</sup>REQUIMTE/LAQV, Departamento de Engenharia Química, Faculdade de Engenharia, Universidade do Porto, Rua Dr. Roberto Frias, 4200-465 Porto, Portugal

<sup>3</sup>REQUIMTE/LAQV, Departamento de Química e Bioquímica, Faculdade de Ciências, Universidade do Porto, Rua do Campo Alegre 687, 4169-007 Porto, Portugal

<sup>4</sup>IPC – Institute for Polymers and Composites/I3N, Department of Polymer Engineering, University of Minho, Campus de Azurém, 4800-058 Guimarães, Portugal

\* Correspondence: H.K.S. Souza, hileia.souza@dep.uminho.pt

## Supplementary Materials:

Table S1: Colour parameters for bread (unwrapped control);

Table S2: Colour parameters for bread wrapped in MC 2% film;

Table S3: Colour parameters for bread wrapped in MC 2% \_DES 10% film;

Table S4: Colour parameters for bread wrapped in MC 2% \_MO 10% film.

**Table S1.** Colour parameters for bread (unwrapped control)

| Day | L*                        | a*                        | b*                       | a*/b*    |
|-----|---------------------------|---------------------------|--------------------------|----------|
| 0   | 54.58 ± 3.04 <sup>a</sup> | -0.33 ± 0.09 <sup>a</sup> | 3.65 ± 0.20              | -0.09041 |
| 1   | 56.95 ± 1.92 <sup>a</sup> | -0.59 ± 0.02 <sup>b</sup> | 4.85 ± 0.19              | -0.12165 |
| 4   | 58.24 ± 2.62 <sup>b</sup> | -0.60 ± 0.07 <sup>b</sup> | 5.83 ± 0.33              | -0.10292 |
| 7   | 59.93 ± 0.52 <sup>b</sup> | -0.30 ± 0.12 <sup>a</sup> | 7.03 ± 0.20 <sup>a</sup> | -0.04267 |
| 11  | 51.04 ± 0.04              | 0.32 ± 0.01               | 7.34 ± 0.09 <sup>a</sup> | 0.043597 |

same letters in the same column indicate that values are not significantly different ( $p > 0.05$ ).

**Table S2.** Colour parameters for bread wrapped in MC 2% film

| Day | L*                          | a*                        | b*                       | a*/b*    |
|-----|-----------------------------|---------------------------|--------------------------|----------|
| 0   |                             |                           |                          |          |
| 1   | 57.06 ± 0.69 <sup>a</sup>   | -0.56 ± 0.02 <sup>a</sup> | 5.72 ± 0.37 <sup>a</sup> | -0.0979  |
| 4   | 57.99 ± 0.66 <sup>b</sup>   | -0.63 ± 0.09 <sup>a</sup> | 5.73 ± 0.19 <sup>a</sup> | -0.10995 |
| 7   | 57.32 ± 0.65 <sup>a,b</sup> | -0.48 ± 0.02              | 6.92 ± 0.41              | -0.06936 |
| 11  | 50.78 ± 0.13                | 0.32 ± 0.01               | 7.54 ± 0.03              | 0.04244  |

same letters in the same column indicate that values are not significantly different ( $p > 0.05$ ).

**Table S3.** Colour parameters for bread wrapped in MC 2% \_DES 10% film

| Day | L*                         | a*           | b*          | a*/b*    |
|-----|----------------------------|--------------|-------------|----------|
| 0   |                            |              |             |          |
| 1   | 57.29 ± 0.501 <sup>a</sup> | -0.07 ± 0.03 | 5.62 ± 0.13 | -0.01246 |
| 4   | 57.90 ± 0.86 <sup>a</sup>  | -0.43 ± 0.02 | 5.93 ± 0.21 | -0.07251 |
| 7   | 55.95 ± 0.55 <sup>b</sup>  | -0.32 ± 0.03 | 6.31 ± 0.22 | -0.05071 |
| 11  | 55.18 ± 0.02 <sup>b</sup>  | 0.14 ± 0.02  | 7.32 ± 0.02 | 0.019126 |

same letters in the same column indicate that values are not significantly different ( $p > 0.05$ ).

**Table S4.** Colour parameters for bread wrapped in MC 2% \_MO 10% film

| Day | L*                        | a*           | b*          | a*/b*    |
|-----|---------------------------|--------------|-------------|----------|
| 0   |                           |              |             |          |
| 1   | 59.02 ± 0.88 <sup>a</sup> | -0.40 ± 0.03 | 6.23 ± 0.27 | -0.06421 |
| 4   | 60.93 ± 1.00 <sup>a</sup> | -0.62 ± 0.03 | 5.42 ± 0.12 | -0.11439 |
| 7   | 55.98 ± 1.66              | -0.32 ± 0.08 | 6.65 ± 0.20 | -0.04812 |
| 11  | 52.83 ± 0.80              | 0.31 ± 0.01  | 7.75 ± 0.29 | 0.04000  |

same letters in the same column indicate that values are not significantly different ( $p > 0.05$ ).
